# Supplementary material
Source: publisher site journal article supplement (https://www.dovepress.com/article/242772)
Supplement: Supplementary file 1 [file get_supplementary_file.php]

| Table S1. Comparison between nomogram and TNM staging system | | | | |
| --- | --- | --- | --- | --- |
|  |  | C-index | 95%CI | *P* value |
| Nomogram |  | 0.701 | 0.669—0.733 | 0.016 |
| TNM system |  | 0.666 | 0.630—0.702 |
| **Notes:** Calculation of C-index of nomogram model based on 500 Bootstrap. **Abbreviations:** CI=confidence interval | | | | |

**
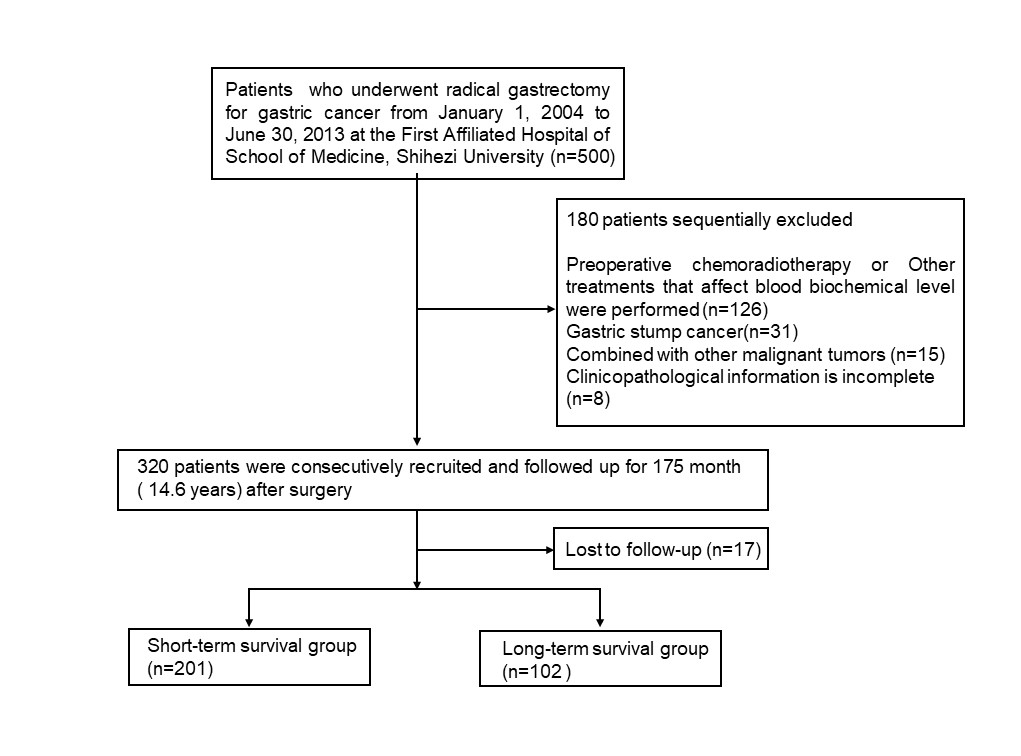
Figure S1:** Flowchart of the study population.

**
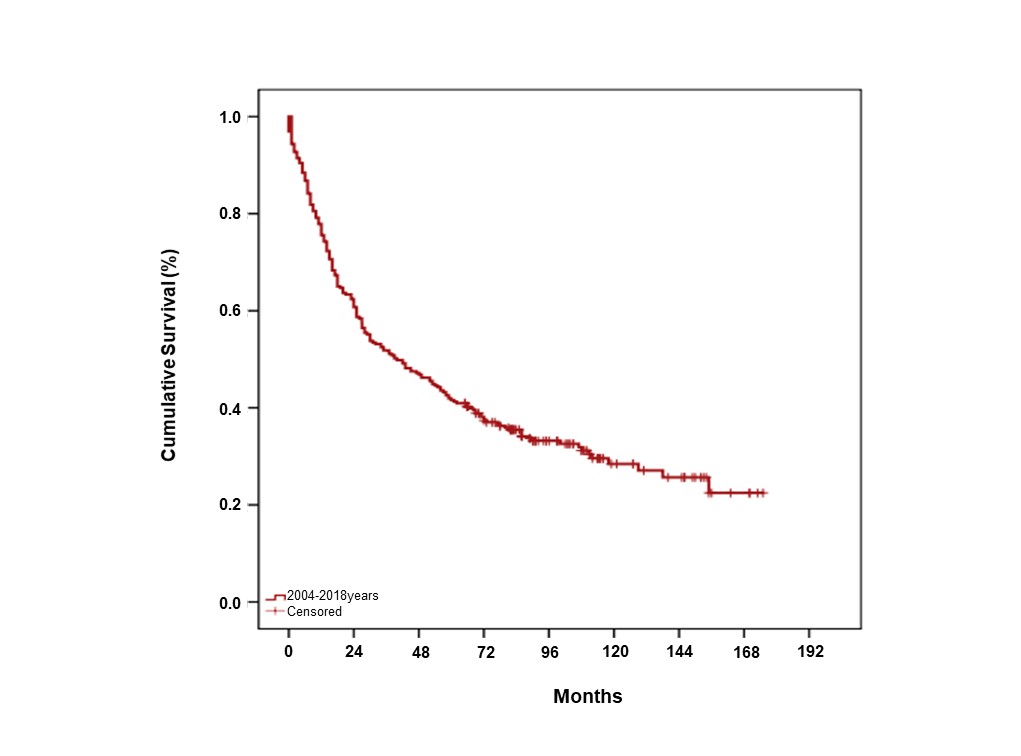
Figure S2:**  Kaplan-Meier survival curves of the 303 patients.
